# Supplementary material
Source: Research Square preprint supplement (doi:10.21203/rs.3.rs-9922916/v1)
Supplement: Supplementary file 1 [file 51c0d66a50975607dcb2aa45.pdf]

How the HATI project supported HIV staging and monitoring laboratory tests at primary care level

A courier service during the intervention phase facilitated transport of blood samples taken at participating primary care facilities to the processing laboratory at Level A hospitals; thus, HATI participants receiving treatment at primary care were not required to travel to external laboratories for CD4 counts or HIV VL monitoring.
