# Supplementary material
Source: Research Square preprint supplement (doi:10.21203/rs.3.rs-9922916/v1)
Supplement: Supplementary file 2 [file 81c8fe8f5978980bef3cb56f.pdf]

## **Additional File 1. General health system and HIV services in Indonesia**

The Indonesian health care system is divided into primary care and hospital-based care. Primary care is mainly provided by the government-run primary care clinics (*Puskesmas, Pusat Kesehatan Masyarakat*, community/primary health care), private clinics, and non-profit clinics run by non-governmental organizations (NGOs). Hospital-based care is provided by types D (lowest level), C, B, and A hospitals (highest level, usually national referral hospitals). Each level of service is directly overseen by the level immediately above it.

Primary care clinics provided HIV services during weekends and evenings, whereas hospitals were only open on weekdays during working hours.

Eligibility criteria for accessing health services include residence in the same geographic area as the primary care service.

The Global Fund and Yayasan Kasih Suwitno (a private NGO), provided financial support for non-ART related HIV services and costs not covered by regulations. These included the honoraria for HIV-peer support workers, and incentives for health workers for providing HIV services out of business hours.
